# Supplementary material for: Therapeutic potential of IBP as an autophagy inducer for treating lung cancer via blocking PAK1/Akt/mTOR signaling
Source: PubMed Central journal article supplement — Mol Ther Oncolytics. 2020 Nov 4;20:82–93. doi: 10.1016/j.omto.2020.10.014 (PMC7851497; doi:10.1016/j.omto.2020.10.014), 2020-11-04
Supplement: mmc1.pdf [file mmc1.pdf]

**OMTO, Volume 20**

## **Supplemental Information**

**Therapeutic potential of IBP as an autophagy  
inducer for treating lung cancer via blocking  
PAK1/Akt/mTOR signaling**

**Huimin Bu, Shirui Tan, Bo Yuan, Xiaomei Huang, Jiebang Jiang, Yejiao Wu, Jihong Jiang, and Rongpeng Li**

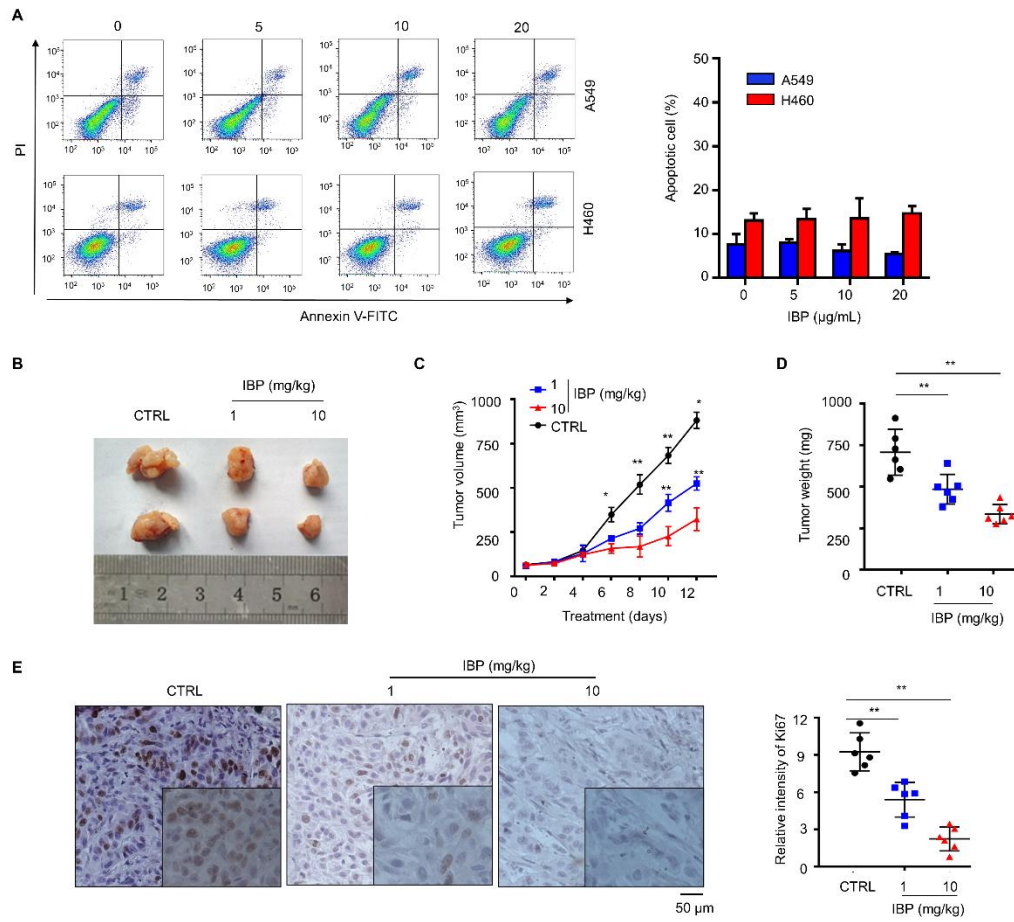

**Figure S1. IBP inhibits lung cancer cells in an apoptosis-independent way.**

(A) A549 and H460 cells were incubated in the presence of IBP at different concentrations (0, 5, 10, 20  $\mu\text{g/mL}$ ) for 48 h. The apoptotic lung cancer cells were assessed by flow cytometry assay. (B-D) H460 cells were subcutaneously inoculated in the back of Balb/C mice. 1 or 10 mg/kg of IBP was administered by intraperitoneal injection every 2 days when the tumor was felt and the tumor size was measured. Mice were sacrificed on day 12, and tumors were excised, photographed and weighed. (E) Ki67 expression in tumor xenografts was examined by IHC. Representative images were provided as indicated; Scale bar, 50  $\mu\text{m}$ . Data are mean  $\pm$  SD from three independent experiments. One-way ANOVA (Tukey's post hoc); \* $p < 0.05$ ; \*\* $p < 0.01$ .

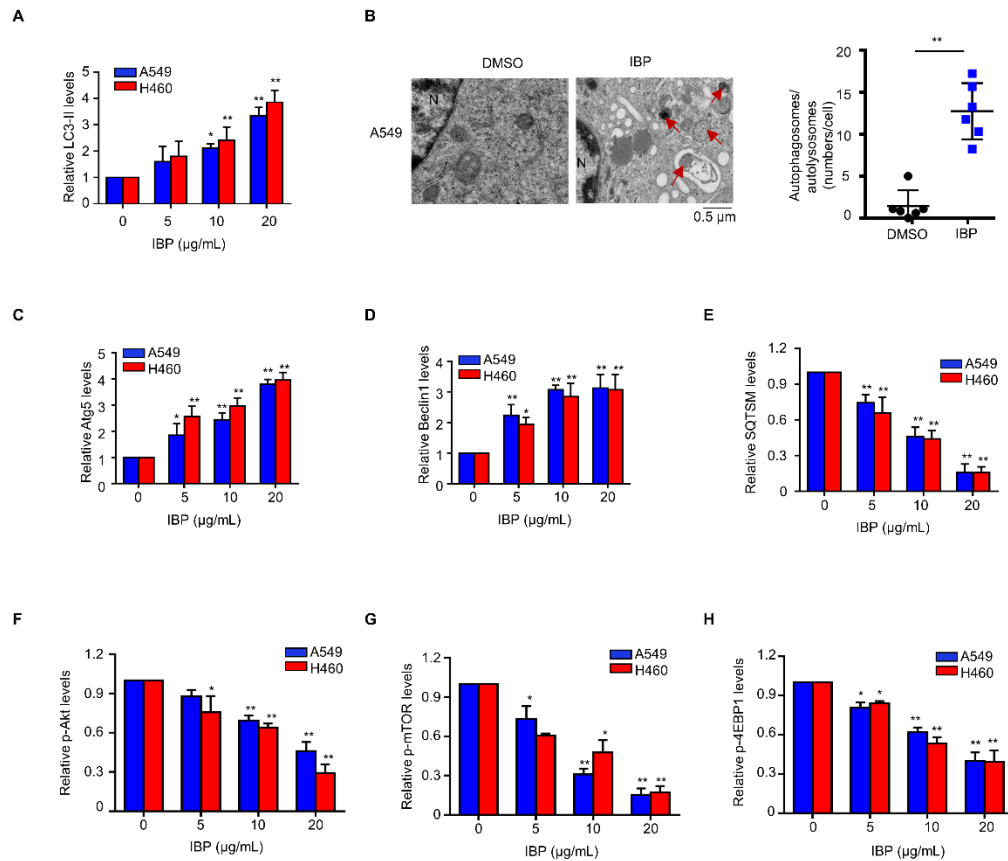

**Figure S2. Densitometric quantification of the immunoblotting gel data presented in main Figures (in text) and autophagosome in A549 cells. (A) Fig. 2A, (B) Autophagy measured by transmission electron microscopy in A549 cells. Arrows, autophagosomes. Cells treated with DMSO or 10 μg/mL IBP for 48 hours was examined. (C-E) Fig. 2A. (F-H) Fig. 4D. Data are mean ± SD from three independent experiments. One-way ANOVA (Tukey's post hoc); \* $p < 0.05$ ; \*\* $p < 0.01$ .**

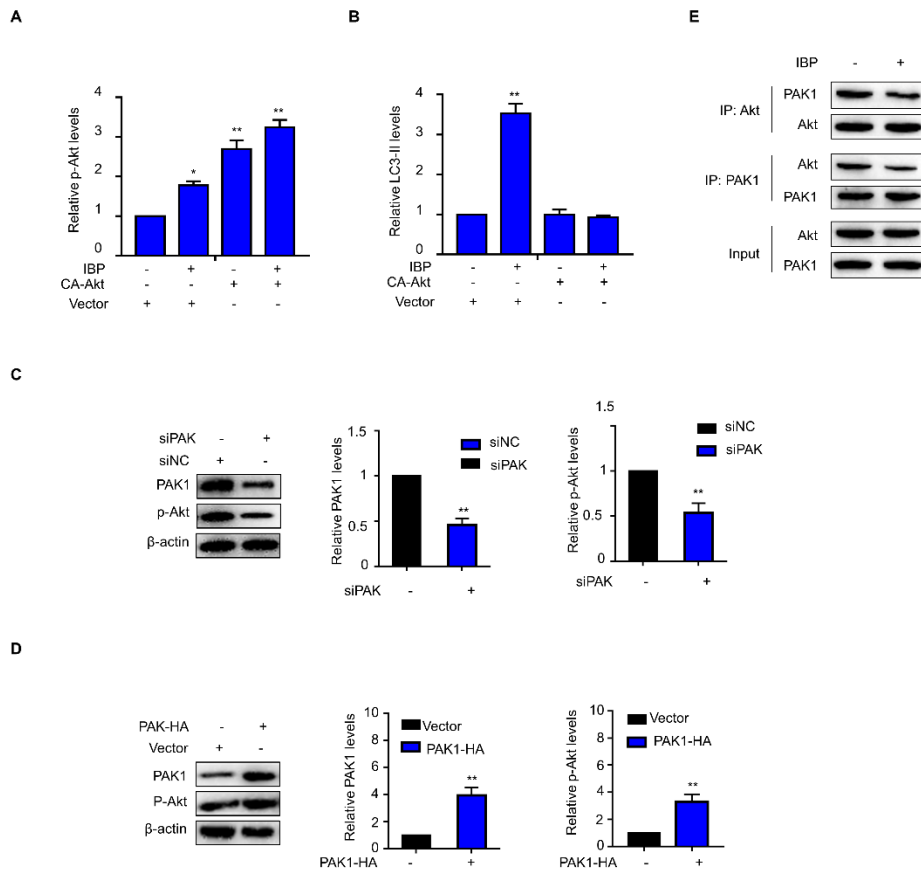

**Figure S3. IBP inhibits Akt/mTOR pathway in A549 cells and Interaction of PAK1 with Akt in A549 cells. (A-B) Fig. 4E. (C-D) PAK1 levels and Akt phosphorylation in A549 by Western blot analysis. Cells were transfected with siPAK1 (C) or a construct encoding PAK1-HA (D) for 48 hours. (E) IP-western blots analysis of the interaction of PAK1 with Akt. A549 cells were treated with 10  $\mu$ g/mL IBP or DMSO for 48 hours after cells were co-transfected with PAK1-HA and Akt-GFP. Data are a representation of 3 independent experiments. One-way ANOVA (Tukey's post hoc); \*,  $p < 0.05$ ; \*\*,  $p < 0.01$ .**

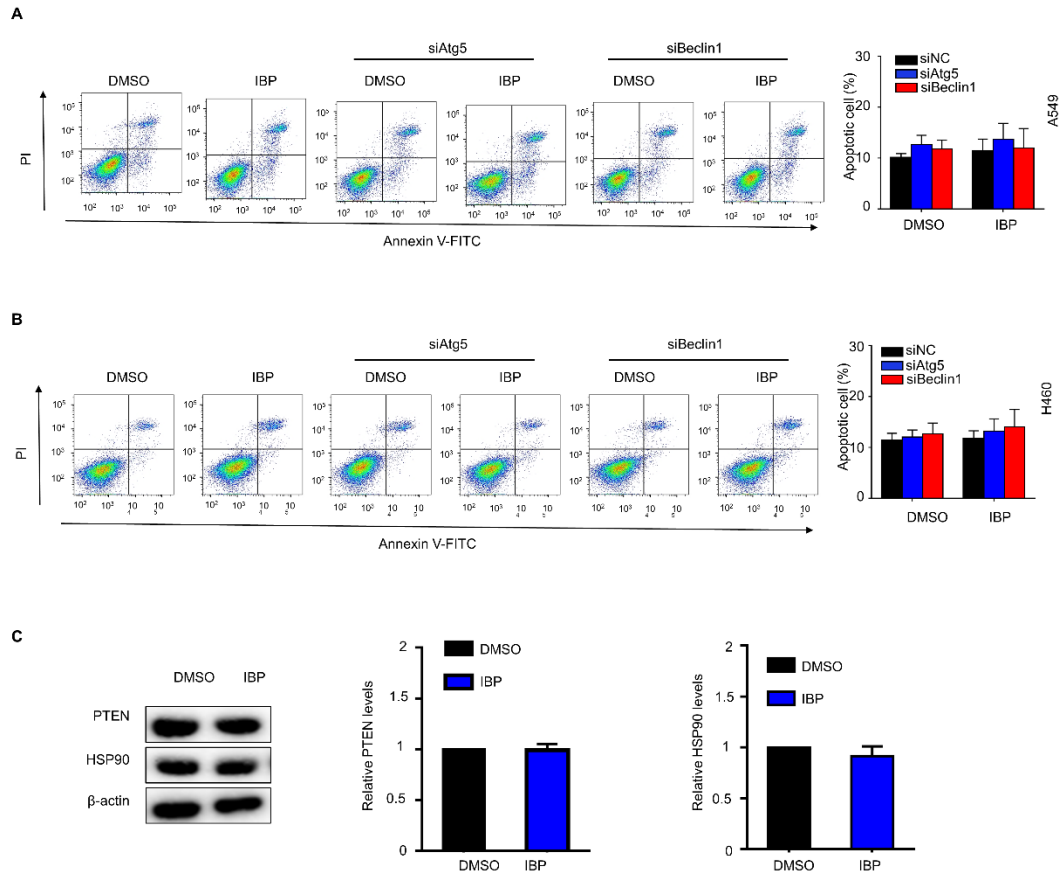

**Figure S4. IBP treatment showed no obvious effect on apoptosis cells in an autophagy-independent way and PETN and HSP90 expression in A549. (A-B)** A549 and H460 cells were transfected with siRNA against Atg5 or Beclin1 or control (50nmol/L) for 48 hours. Then cells were treated with 10  $\mu$ g/mL IBP or DMSO for 48 hours. **(C)** PTEN and HSP90 in A549 by Western blot analysis. Data are shown as means  $\pm$  SD for three independent experiments (cell samples, Tukey's post hoc; \* $p \leq 0.05$ ; \*\* $p \leq 0.01$ ).
